# Supplementary material for: Role of PKN1 in Retinal Cell Type Formation
Source: MDPI journal article supplement (doi:10.3390/ijms25052848), 2024-02-29
Supplement: s1 [file s1]

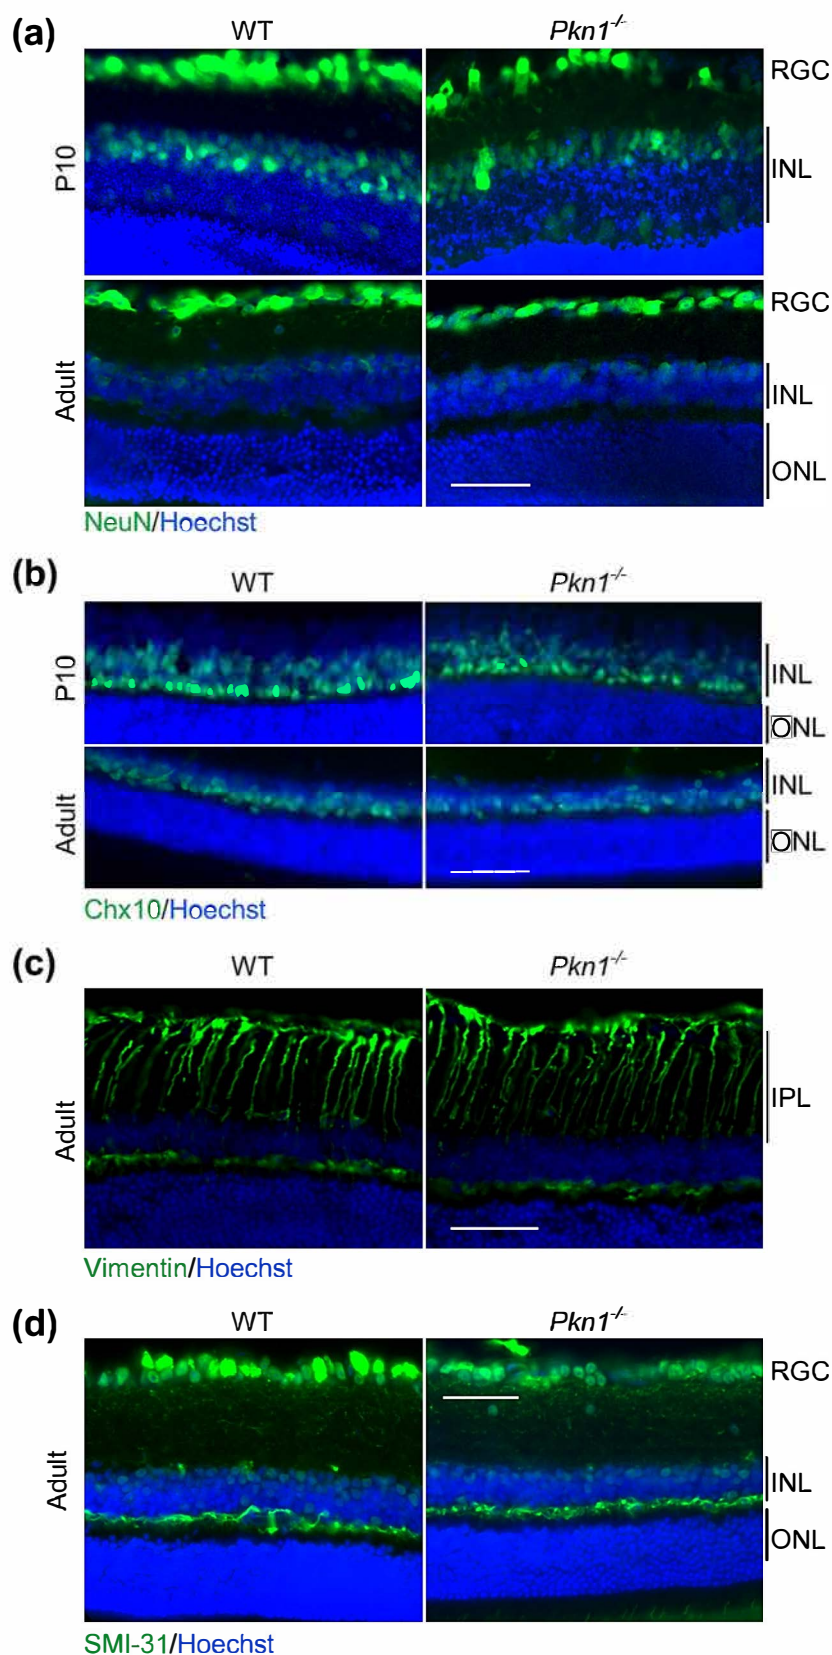

**Supplemental Figure S1:** Staining of retinal sections for various neuronal markers. (a) Retinal sections from P10 old and adult animals were stained for NeuN and Hoechst (see Table 1 and Table 2 in the main manuscript for analysis and n-numbers). (b) Retinal sections from P10 old and adult animals were stained for Chx10 and Hoechst (see Table 1 in the main manuscript for analysis and n-numbers). (c) Adult retinal sections were stained for vimentin and Hoechst to visualize Müller glia cells. Images are representative of 3-4 separate animals per genotype. (d) Adult retinal sections were stained for SMI-31 and Hoechst (see Table 2 in the main manuscript for analysis and n-numbers). INL: inner nuclear layer; IPL: inner plexiform layer; ONL: outer nuclear layer; RGC: retinal ganglion cell layer. All scale bars refer to 50  $\mu$ m.
